# Supplementary material for: Application of Ground-Based Microwave Radiometer in Retrieving Meteorological Characteristics of Tibet Plateau
Source: MDPI journal article supplement (doi:10.3390/rs13132527), 2021-06-28
Supplement: s1 [file s1]

The mean difference (MD) and root mean square error (RMSE) of temperature, vapor density and relative humidity obtained from radiosonde observations and MWR products under clear-sky, cloudy-sky, and rainy-sky conditions are presented. The values of MD and RMSE refer to errors of radiosonde variables relative to MWR products.

**Table S1.** MD and RMSE values between RAOB and MWR.

|      |     | Clear-sky |         | Cloudy-sky |         | Rainy-sky |         |
|------|-----|-----------|---------|------------|---------|-----------|---------|
| Type |     | MD        | RMSE    | MD         | RMSE    | MD        | RMSE    |
| T07  | ave | 0.2822    | 0.9224  | 0.2199     | 0.8067  | -0.4157   | 1.1444  |
|      | max | 1.1386    | 1.358   | 0.944      | 1.3939  | 0.2292    | 1.5399  |
|      | min | -0.5648   | 0.68    | -0.6156    | 0.4001  | -0.9742   | 0.7664  |
| T19  | ave | 0.1212    | 0.9359  | 0.2414     | 0.991   | 0.5366    | 1.4211  |
|      | max | 0.9294    | 1.7362  | 1.224      | 1.2612  | 1.329     | 1.6209  |
|      | min | -0.3717   | 0.4081  | -0.5469    | 0.6031  | -0.0638   | 1.002   |
| VD07 | ave | 0.0811    | 0.4419  | -0.3607    | 0.3214  | -0.5171   | 0.4902  |
|      | max | 0.6492    | 0.8289  | 0.1138     | 0.7126  | 0.1139    | 0.8844  |
|      | min | -0.9611   | 0.0104  | -1.3279    | 0.0124  | -1.2273   | 0.0119  |
| VD19 | ave | -0.0666   | 0.4253  | -0.1378    | 0.315   | 0.0344    | 0.3891  |
|      | max | 0.2915    | 0.791   | 0.0843     | 0.6491  | 0.5934    | 0.7737  |
|      | min | -0.6765   | 0.01    | -0.6799    | 0.0371  | -0.4878   | 0.0599  |
| RH07 | ave | -1.5909   | 10.227  | -2.426     | 7.2901  | -4.1536   | 7.0493  |
|      | max | 1.3676    | 17.0122 | 5.7115     | 15.1153 | 2.3618    | 14.9963 |
|      | min | -5.0809   | 3.0672  | -12.1549   | 2.2237  | -9.8506   | 2.797   |
| RH19 | ave | -1.5069   | 11.0179 | -2.4795    | 8.7616  | -4.7248   | 9.4473  |
|      | max | 3.6164    | 14.4699 | 2.1363     | 14.1467 | 0.9241    | 14.2414 |
|      | min | -5.9185   | 5.7472  | -8.3138    | 3.4379  | -11.803   | 5.5414  |
